# Supplementary material
Source: publisher figshare collection journal article supplement (https://acs.figshare.com/ndownloader/files/5610050)
Supplement: Supplementary file 1 [file 5610050]

 
data_y 
 
_audit_creation_method            SHELXL-97 
_chemical_name_systematic 
; 
 ? 
; 
_chemical_name_common             ? 
_chemical_melting_point           ? 
_chemical_formula_moiety        'C17 H20 F N O4 S'  
_chemical_formula_sum             'C17 H20 F N O4 S' 
_chemical_formula_weight          353.40 
 
loop_ 
 _atom_type_symbol 
 _atom_type_description 
 _atom_type_scat_dispersion_real 
 _atom_type_scat_dispersion_imag 
 _atom_type_scat_source 
 'C'  'C'   0.0033   0.0016 
 'International Tables Vol C Tables 4.2.6.8 and 6.1.1.4' 
 'H'  'H'   0.0000   0.0000 
 'International Tables Vol C Tables 4.2.6.8 and 6.1.1.4' 
 'O'  'O'   0.0106   0.0060 
 'International Tables Vol C Tables 4.2.6.8 and 6.1.1.4' 
 'S'  'S'   0.1246   0.1234 
 'International Tables Vol C Tables 4.2.6.8 and 6.1.1.4' 
 'F'  'F'   0.0171   0.0103 
 'International Tables Vol C Tables 4.2.6.8 and 6.1.1.4' 
 'N'  'N'   0.0061   0.0033 
 'International Tables Vol C Tables 4.2.6.8 and 6.1.1.4' 
 
_symmetry_cell_setting           triclinic
_symmetry_space_group_name_H-M   P-1
 
loop_ 
 _symmetry_equiv_pos_as_xyz 
 'x, y, z' 
 '-x, -y, -z' 
 
_cell_length_a                    8.5007(9) 
_cell_length_b                    10.2500(12) 
_cell_length_c                    11.2985(15) 
_cell_angle_alpha                 75.804(10) 
_cell_angle_beta                  70.345(11) 
_cell_angle_gamma                 81.631(9) 
_cell_volume                      896.65(18) 
_cell_formula_units_Z             2 
_cell_measurement_temperature     293(2)  
_cell_measurement_reflns_used   1893
_cell_measurement_theta_min     2.9960
_cell_measurement_theta_max     29.0379
 
_exptl_crystal_description        block 
_exptl_crystal_colour             colorless
_exptl_crystal_size_max          0.4 
_exptl_crystal_size_mid           0.39 
_exptl_crystal_size_min           0.38 
_exptl_crystal_density_meas       ? 
_exptl_crystal_density_diffrn     1.309 
_exptl_crystal_density_method     'not measured' 
_exptl_crystal_F_000              372 
_exptl_absorpt_coefficient_mu     0.210 
_exptl_absorpt_correction_type     'multi-scan' 
_exptl_absorpt_correction_T_min   0.94220
_exptl_absorpt_correction_T_max  1.00000
_exptl_absorpt_process_details   
;
CrysAlisPro, Agilent Technologies,
Version 1.171.35.21 (release 20-01-2012 CrysAlis171 .NET)
(compiled Jan 23 2012,18:06:46)
Empirical absorption correction using spherical harmonics,
implemented in SCALE3 ABSPACK scaling algorithm.
;
_exptl_special_details 
; 
 ? 
; 
 
_diffrn_ambient_temperature       293(2) 
_diffrn_radiation_wavelength      0.71073 
_diffrn_radiation_type            MoK\a 
_diffrn_radiation_source          'fine-focus sealed tube' 
_diffrn_radiation_monochromator   graphite 
_diffrn_measurement_device_type   'CCD area detector' 
_diffrn_measurement_method        'omega scans' 
_diffrn_detector_area_resol_mean  ? 
_diffrn_standards_number          ? 
_diffrn_standards_interval_count  ? 
_diffrn_standards_interval_time   ? 
_diffrn_standards_decay_%         ? 
_diffrn_reflns_number             5666 
_diffrn_reflns_av_R_equivalents   0.0203 
_diffrn_reflns_av_sigmaI/netI     0.0369 
_diffrn_reflns_limit_h_min        -10 
_diffrn_reflns_limit_h_max        8 
_diffrn_reflns_limit_k_min        -10 
_diffrn_reflns_limit_k_max        12 
_diffrn_reflns_limit_l_min        -12 
_diffrn_reflns_limit_l_max        13 
_diffrn_reflns_theta_min          3.00 
_diffrn_reflns_theta_max          25.99 
_reflns_number_total              3499 
_reflns_number_gt                 2563 
_reflns_threshold_expression      >2sigma(I) 
 
_computing_data_collection        ? 
_computing_cell_refinement        ? 
_computing_data_reduction         ? 
_computing_structure_solution     'SHELXS-97 (Sheldrick, 1990)' 
_computing_structure_refinement   'SHELXL-97 (Sheldrick, 1997)' 
_computing_molecular_graphics     ? 
_computing_publication_material   ? 
 
_refine_special_details 
; 
 Refinement of F^2^ against ALL reflections.  The weighted R-factor wR and 
 goodness of fit S are based on F^2^, conventional R-factors R are based 
 on F, with F set to zero for negative F^2^. The threshold expression of 
 F^2^ > 2sigma(F^2^) is used only for calculating R-factors(gt) etc. and is 
 not relevant to the choice of reflections for refinement.  R-factors based 
 on F^2^ are statistically about twice as large as those based on F, and R- 
 factors based on ALL data will be even larger. 
; 
 
_refine_ls_structure_factor_coef  Fsqd  
_refine_ls_matrix_type            full 
_refine_ls_weighting_scheme       calc  
_refine_ls_weighting_details 
 'calc w=1/[\s^2^(Fo^2^)+(0.0681P)^2^+0.3174P] where P=(Fo^2^+2Fc^2^)/3' 
_atom_sites_solution_primary      direct 
_atom_sites_solution_secondary    difmap 
_atom_sites_solution_hydrogens    geom 
_refine_ls_hydrogen_treatment     constr 
_refine_ls_extinction_method      none 
_refine_ls_extinction_coef        ? 
_refine_ls_number_reflns          3499 
_refine_ls_number_parameters      258 
_refine_ls_number_restraints      216 
_refine_ls_R_factor_all           0.0749 
_refine_ls_R_factor_gt            0.0532 
_refine_ls_wR_factor_ref          0.1505 
_refine_ls_wR_factor_gt           0.1305 
_refine_ls_goodness_of_fit_ref    1.024 
_refine_ls_restrained_S_all       1.089 
_refine_ls_shift/su_max           0.007 
_refine_ls_shift/su_mean          0.001 
 
loop_ 
 _atom_site_label 
 _atom_site_type_symbol 
 _atom_site_fract_x 
 _atom_site_fract_y 
 _atom_site_fract_z 
 _atom_site_U_iso_or_equiv 
 _atom_site_adp_type 
 _atom_site_occupancy 
 _atom_site_symmetry_multiplicity 
 _atom_site_calc_flag 
 _atom_site_refinement_flags 
 _atom_site_disorder_assembly 
 _atom_site_disorder_group 
S1 S 0.19426(8) 0.52157(7) 0.26875(7) 0.0575(3) Uani 1 1 d . . . 
C1 C 0.5205(3) 0.5942(2) 0.1935(2) 0.0426(5) Uani 1 1 d . . . 
C2 C 0.4110(3) 0.5071(2) 0.2046(2) 0.0408(5) Uani 1 1 d . . . 
C3 C 0.5035(3) 0.3951(2) 0.1413(2) 0.0433(6) Uani 1 1 d . A . 
C4 C 0.7953(3) 0.3187(3) 0.0527(2) 0.0536(7) Uani 1 1 d . A . 
H4A H 0.8980 0.3633 0.0048 0.064 Uiso 1 1 calc R . . 
H4B H 0.7624 0.2825 -0.0065 0.064 Uiso 1 1 calc R . . 
C5 C 0.6971(3) 0.5414(3) 0.1290(2) 0.0464(6) Uani 1 1 d . A . 
C6 C 0.8024(4) 0.5191(3) 0.2177(3) 0.0641(8) Uani 1 1 d . . . 
H6A H 0.9113 0.4801 0.1775 0.096 Uiso 1 1 calc R . . 
H6B H 0.7493 0.4592 0.2969 0.096 Uiso 1 1 calc R . . 
H6C H 0.8135 0.6039 0.2349 0.096 Uiso 1 1 calc R . . 
C7 C 0.4876(3) 0.7189(2) 0.2427(2) 0.0491(6) Uani 1 1 d . . . 
C8 C 0.4104(5) 0.7152(3) 0.3714(3) 0.0722(9) Uani 1 1 d . . . 
H8 H 0.3773 0.6333 0.4264 0.087 Uiso 1 1 calc R . . 
C9 C 0.3806(6) 0.8293(4) 0.4210(3) 0.0924(12) Uani 1 1 d . . . 
H9 H 0.3291 0.8258 0.5084 0.111 Uiso 1 1 calc R . . 
C10 C 0.4291(6) 0.9475(3) 0.3379(4) 0.0888(12) Uani 1 1 d . . . 
C11 C 0.5015(6) 0.9571(3) 0.2108(4) 0.0919(12) Uani 1 1 d . . . 
H11 H 0.5301 1.0402 0.1565 0.110 Uiso 1 1 calc R . . 
C12 C 0.5325(5) 0.8423(3) 0.1628(3) 0.0715(9) Uani 1 1 d . . . 
H12 H 0.5845 0.8474 0.0752 0.086 Uiso 1 1 calc R . . 
C13 C 0.1503(4) 0.3593(3) 0.3741(3) 0.0775(9) Uani 1 1 d . . . 
H13A H 0.0299 0.3536 0.4088 0.093 Uiso 1 1 calc R . . 
H13B H 0.1954 0.2899 0.3243 0.093 Uiso 1 1 calc R . . 
C14 C 0.2188(6) 0.3318(4) 0.4802(4) 0.1098(15) Uani 1 1 d . . . 
H14A H 0.3389 0.3272 0.4472 0.165 Uiso 1 1 calc R . . 
H14B H 0.1827 0.2474 0.5362 0.165 Uiso 1 1 calc R . . 
H14C H 0.1801 0.4027 0.5273 0.165 Uiso 1 1 calc R . . 
C15 C 0.8275(5) 0.2058(3) 0.1549(3) 0.0841(11) Uani 1 1 d . . . 
O3A O 0.8206(11) 0.2162(10) 0.2608(9) 0.100(2) Uani 0.50 1 d PU A 1 
O4A O 0.8860(8) 0.0917(6) 0.1075(6) 0.0740(16) Uani 0.50 1 d PU A 1 
C16A C 0.9224(13) -0.0229(9) 0.1971(10) 0.104(2) Uani 0.50 1 d PU A 1 
H16A H 0.8867 -0.1016 0.1825 0.124 Uiso 0.50 1 calc PR A 1 
H16B H 0.8554 -0.0118 0.2829 0.124 Uiso 0.50 1 calc PR A 1 
C17A C 1.0953(15) -0.0497(12) 0.1938(12) 0.129(3) Uani 0.50 1 d PU A 1 
H17A H 1.1670 -0.0202 0.1076 0.193 Uiso 0.50 1 calc PR A 1 
H17B H 1.1177 -0.1448 0.2219 0.193 Uiso 0.50 1 calc PR A 1 
H17C H 1.1161 -0.0020 0.2497 0.193 Uiso 0.50 1 calc PR A 1 
O3B O 0.7426(8) 0.1943(8) 0.2695(7) 0.0789(18) Uani 0.50 1 d PU A 2 
O4B O 0.9591(9) 0.1272(7) 0.0998(8) 0.0934(19) Uani 0.50 1 d PU A 2 
C16B C 1.0622(16) 0.0286(10) 0.1759(12) 0.123(3) Uani 0.50 1 d PU A 2 
H16C H 1.1753 0.0102 0.1220 0.147 Uiso 0.50 1 calc PR A 2 
H16D H 1.0658 0.0609 0.2487 0.147 Uiso 0.50 1 calc PR A 2 
C17B C 0.972(2) -0.0782(13) 0.2128(14) 0.145(4) Uani 0.50 1 d PU A 2 
H17D H 0.8567 -0.0519 0.2516 0.217 Uiso 0.50 1 calc PR A 2 
H17E H 1.0116 -0.1456 0.2740 0.217 Uiso 0.50 1 calc PR A 2 
H17F H 0.9834 -0.1144 0.1394 0.217 Uiso 0.50 1 calc PR A 2 
F1 F 0.3970(4) 1.0597(2) 0.3874(3) 0.1400(11) Uani 1 1 d . . . 
N1 N 0.6667(3) 0.4157(2) 0.1041(2) 0.0471(5) Uani 1 1 d . . . 
O1 O 0.7842(2) 0.62643(19) 0.01443(17) 0.0549(5) Uani 1 1 d . . . 
H1 H 0.7258 0.6489 -0.0331 0.082 Uiso 1 1 calc R A . 
O2 O 0.4455(2) 0.30161(16) 0.12353(17) 0.0532(5) Uani 1 1 d . . . 
 
loop_ 
 _atom_site_aniso_label 
 _atom_site_aniso_U_11 
 _atom_site_aniso_U_22 
 _atom_site_aniso_U_33 
 _atom_site_aniso_U_23 
 _atom_site_aniso_U_13 
 _atom_site_aniso_U_12 
S1 0.0352(4) 0.0696(5) 0.0612(5) -0.0051(3) -0.0134(3) -0.0028(3) 
C1 0.0411(14) 0.0483(13) 0.0389(13) -0.0075(10) -0.0149(11) -0.0016(10) 
C2 0.0351(13) 0.0466(12) 0.0399(12) -0.0053(9) -0.0141(10) -0.0011(10) 
C3 0.0458(15) 0.0441(13) 0.0391(13) -0.0009(9) -0.0176(11) -0.0042(11) 
C4 0.0491(16) 0.0572(15) 0.0475(15) -0.0100(11) -0.0129(12) 0.0113(12) 
C5 0.0371(14) 0.0576(14) 0.0463(14) -0.0118(11) -0.0134(11) -0.0059(11) 
C6 0.0485(17) 0.089(2) 0.0631(18) -0.0184(15) -0.0274(14) -0.0024(15) 
C7 0.0481(15) 0.0522(14) 0.0513(15) -0.0149(11) -0.0188(12) -0.0019(11) 
C8 0.099(3) 0.0591(17) 0.0566(18) -0.0166(14) -0.0216(17) 0.0018(16) 
C9 0.136(4) 0.081(2) 0.064(2) -0.0352(18) -0.032(2) 0.018(2) 
C10 0.125(3) 0.0571(19) 0.100(3) -0.0377(19) -0.049(3) 0.0118(19) 
C11 0.129(4) 0.0557(19) 0.090(3) -0.0175(17) -0.028(2) -0.0144(19) 
C12 0.089(2) 0.0553(17) 0.0653(19) -0.0149(14) -0.0137(17) -0.0114(15) 
C13 0.066(2) 0.077(2) 0.070(2) -0.0014(16) -0.0001(17) -0.0193(16) 
C14 0.145(4) 0.096(3) 0.070(2) 0.0012(19) -0.030(3) 0.010(3) 
C15 0.106(3) 0.077(2) 0.058(2) -0.0096(16) -0.030(2) 0.029(2) 
O3A 0.121(5) 0.097(4) 0.078(4) -0.005(3) -0.044(4) 0.013(4) 
O4A 0.074(3) 0.058(3) 0.078(3) -0.005(2) -0.023(3) 0.016(2) 
C16A 0.094(4) 0.068(4) 0.113(4) 0.018(3) -0.029(4) 0.035(3) 
C17A 0.102(5) 0.110(5) 0.146(5) 0.022(5) -0.052(5) 0.031(5) 
O3B 0.089(4) 0.088(3) 0.049(3) -0.001(2) -0.022(3) 0.006(3) 
O4B 0.091(4) 0.069(3) 0.114(3) -0.009(3) -0.046(3) 0.030(3) 
C16B 0.112(5) 0.095(4) 0.140(4) -0.002(4) -0.040(4) 0.017(4) 
C17B 0.130(6) 0.128(6) 0.142(6) 0.008(5) -0.027(5) 0.001(5) 
F1 0.230(3) 0.0745(14) 0.137(2) -0.0613(14) -0.070(2) 0.0204(16) 
N1 0.0384(12) 0.0516(12) 0.0503(12) -0.0151(9) -0.0115(9) 0.0019(9) 
O1 0.0421(11) 0.0710(12) 0.0504(11) -0.0092(9) -0.0111(8) -0.0149(9) 
O2 0.0596(12) 0.0462(10) 0.0586(11) -0.0097(8) -0.0231(9) -0.0095(8) 
 
_geom_special_details 
; 
 All esds (except the esd in the dihedral angle between two l.s. planes) 
 are estimated using the full covariance matrix.  The cell esds are taken 
 into account individually in the estimation of esds in distances, angles 
 and torsion angles; correlations between esds in cell parameters are only 
 used when they are defined by crystal symmetry.  An approximate (isotropic) 
 treatment of cell esds is used for estimating esds involving l.s. planes. 
; 
 
loop_ 
 _geom_bond_atom_site_label_1 
 _geom_bond_atom_site_label_2 
 _geom_bond_distance 
 _geom_bond_site_symmetry_2 
 _geom_bond_publ_flag 
S1 C2 1.737(2) . ? 
S1 C13 1.799(3) . ? 
C1 C2 1.337(3) . ? 
C1 C7 1.470(3) . ? 
C1 C5 1.516(3) . ? 
C2 C3 1.486(3) . ? 
C3 O2 1.225(3) . ? 
C3 N1 1.340(3) . ? 
C4 N1 1.436(3) . ? 
C4 C15 1.487(4) . ? 
C4 H4A 0.9700 . ? 
C4 H4B 0.9700 . ? 
C5 O1 1.405(3) . ? 
C5 N1 1.459(3) . ? 
C5 C6 1.513(4) . ? 
C6 H6A 0.9600 . ? 
C6 H6B 0.9600 . ? 
C6 H6C 0.9600 . ? 
C7 C8 1.373(4) . ? 
C7 C12 1.381(4) . ? 
C8 C9 1.373(4) . ? 
C8 H8 0.9300 . ? 
C9 C10 1.358(5) . ? 
C9 H9 0.9300 . ? 
C10 C11 1.343(5) . ? 
C10 F1 1.353(4) . ? 
C11 C12 1.369(4) . ? 
C11 H11 0.9300 . ? 
C12 H12 0.9300 . ? 
C13 C14 1.454(5) . ? 
C13 H13A 0.9700 . ? 
C13 H13B 0.9700 . ? 
C14 H14A 0.9600 . ? 
C14 H14B 0.9600 . ? 
C14 H14C 0.9600 . ? 
C15 O3A 1.209(10) . ? 
C15 O3B 1.238(8) . ? 
C15 O4B 1.344(8) . ? 
C15 O4A 1.363(7) . ? 
O4A C16A 1.421(10) . ? 
C16A C17A 1.445(16) . ? 
C16A H16A 0.9700 . ? 
C16A H16B 0.9700 . ? 
C17A H17A 0.9600 . ? 
C17A H17B 0.9600 . ? 
C17A H17C 0.9600 . ? 
O4B C16B 1.533(13) . ? 
C16B C17B 1.327(18) . ? 
C16B H16C 0.9700 . ? 
C16B H16D 0.9700 . ? 
C17B H17D 0.9600 . ? 
C17B H17E 0.9600 . ? 
C17B H17F 0.9600 . ? 
O1 H1 0.8200 . ? 
 
loop_ 
 _geom_angle_atom_site_label_1 
 _geom_angle_atom_site_label_2 
 _geom_angle_atom_site_label_3 
 _geom_angle 
 _geom_angle_site_symmetry_1 
 _geom_angle_site_symmetry_3 
 _geom_angle_publ_flag 
C2 S1 C13 102.22(14) . . ? 
C2 C1 C7 128.3(2) . . ? 
C2 C1 C5 110.0(2) . . ? 
C7 C1 C5 121.6(2) . . ? 
C1 C2 C3 108.6(2) . . ? 
C1 C2 S1 128.10(19) . . ? 
C3 C2 S1 123.07(17) . . ? 
O2 C3 N1 125.2(2) . . ? 
O2 C3 C2 127.9(2) . . ? 
N1 C3 C2 106.9(2) . . ? 
N1 C4 C15 112.3(2) . . ? 
N1 C4 H4A 109.2 . . ? 
C15 C4 H4A 109.2 . . ? 
N1 C4 H4B 109.2 . . ? 
C15 C4 H4B 109.1 . . ? 
H4A C4 H4B 107.9 . . ? 
O1 C5 N1 110.90(19) . . ? 
O1 C5 C6 106.3(2) . . ? 
N1 C5 C6 112.7(2) . . ? 
O1 C5 C1 114.9(2) . . ? 
N1 C5 C1 101.54(19) . . ? 
C6 C5 C1 110.7(2) . . ? 
C5 C6 H6A 109.5 . . ? 
C5 C6 H6B 109.5 . . ? 
H6A C6 H6B 109.5 . . ? 
C5 C6 H6C 109.5 . . ? 
H6A C6 H6C 109.5 . . ? 
H6B C6 H6C 109.5 . . ? 
C8 C7 C12 117.9(3) . . ? 
C8 C7 C1 120.1(2) . . ? 
C12 C7 C1 121.9(2) . . ? 
C7 C8 C9 121.7(3) . . ? 
C7 C8 H8 119.1 . . ? 
C9 C8 H8 119.1 . . ? 
C10 C9 C8 117.7(3) . . ? 
C10 C9 H9 121.2 . . ? 
C8 C9 H9 121.2 . . ? 
C11 C10 F1 119.8(3) . . ? 
C11 C10 C9 123.0(3) . . ? 
F1 C10 C9 117.2(4) . . ? 
C10 C11 C12 118.8(3) . . ? 
C10 C11 H11 120.6 . . ? 
C12 C11 H11 120.6 . . ? 
C11 C12 C7 120.9(3) . . ? 
C11 C12 H12 119.5 . . ? 
C7 C12 H12 119.5 . . ? 
C14 C13 S1 114.0(3) . . ? 
C14 C13 H13A 108.8 . . ? 
S1 C13 H13A 108.8 . . ? 
C14 C13 H13B 108.8 . . ? 
S1 C13 H13B 108.8 . . ? 
H13A C13 H13B 107.6 . . ? 
C13 C14 H14A 109.5 . . ? 
C13 C14 H14B 109.5 . . ? 
H14A C14 H14B 109.5 . . ? 
C13 C14 H14C 109.5 . . ? 
H14A C14 H14C 109.5 . . ? 
H14B C14 H14C 109.5 . . ? 
O3A C15 O3B 33.2(5) . . ? 
O3A C15 O4B 114.1(6) . . ? 
O3B C15 O4B 129.3(5) . . ? 
O3A C15 O4A 124.1(6) . . ? 
O3B C15 O4A 118.7(5) . . ? 
O4B C15 O4A 31.5(3) . . ? 
O3A C15 C4 125.1(5) . . ? 
O3B C15 C4 122.5(5) . . ? 
O4B C15 C4 108.2(4) . . ? 
O4A C15 C4 110.3(4) . . ? 
C15 O4A C16A 115.2(7) . . ? 
O4A C16A C17A 116.5(10) . . ? 
O4A C16A H16A 108.2 . . ? 
C17A C16A H16A 108.2 . . ? 
O4A C16A H16B 108.2 . . ? 
C17A C16A H16B 108.2 . . ? 
H16A C16A H16B 107.3 . . ? 
C15 O4B C16B 122.8(8) . . ? 
C17B C16B O4B 99.5(12) . . ? 
C17B C16B H16C 111.9 . . ? 
O4B C16B H16C 111.9 . . ? 
C17B C16B H16D 111.9 . . ? 
O4B C16B H16D 111.9 . . ? 
H16C C16B H16D 109.6 . . ? 
C16B C17B H17D 109.5 . . ? 
C16B C17B H17E 109.5 . . ? 
H17D C17B H17E 109.5 . . ? 
C16B C17B H17F 109.5 . . ? 
H17D C17B H17F 109.5 . . ? 
H17E C17B H17F 109.5 . . ? 
C3 N1 C4 122.4(2) . . ? 
C3 N1 C5 112.8(2) . . ? 
C4 N1 C5 124.7(2) . . ? 
C5 O1 H1 109.5 . . ? 
 
_diffrn_measured_fraction_theta_max    0.993 
_diffrn_reflns_theta_full              25.99 
_diffrn_measured_fraction_theta_full   0.993 
_refine_diff_density_max    0.392 
_refine_diff_density_min   -0.327 
_refine_diff_density_rms    0.044 
